# Supplementary material for: Development and Validation of a Model to Predict Severe Hospital-Acquired Acute Kidney Injury in Non-Critically Ill Patients
Source: MDPI journal article supplement (doi:10.3390/jcm10173959), 2021-08-31
Supplement: s1 [file s1]

## SUPPLEMENTARY MATERIALS

**Table S1.** List of nephrotoxic drugs included.

| Non-steroidal<br>anti-<br>inflammatory<br>drugs | Antibiotics                                                                           | Antiviral agents                                                                                            | Antifungal<br>agents                             | Immunosuppressors                                                                                | Chemotherapy                                                                                                                                                                                                                              | Others                                    |
|-------------------------------------------------|---------------------------------------------------------------------------------------|-------------------------------------------------------------------------------------------------------------|--------------------------------------------------|--------------------------------------------------------------------------------------------------|-------------------------------------------------------------------------------------------------------------------------------------------------------------------------------------------------------------------------------------------|-------------------------------------------|
| All                                             | Vancomycin<br>Aminoglycosides:<br>amikacin, gentamicin,<br>netilmicin<br>Sulfadiazine | Nucleosidic<br>inhibitors:<br>acyclovir,<br>adefovir,<br>cidofovir,<br>tenofovir,<br>indinavir<br>Foscarnet | Amphotericin<br>B<br>Caspofungin<br>Voriconazole | Cyclosporin<br>Tacrolimus<br>Everolimus<br>Temsirolimus<br>Immunoglobulins<br>containing sucrose | Cisplatin,<br>Carboplatin<br>Gemcitabine<br>Ifosfamide<br>Mitramycin<br>Pemetrexed<br>Linalidomide<br>Venetoclax<br>Pentostatine<br>Imatininib,<br>Dasatininb<br>Methotrexate<br>(high dose > 10<br>g/m2)<br>VEGF inhibitors<br>Ibrutinib | Mannitol<br>Lithium<br>Zoledronic<br>acid |
